# Supplementary material for: Assessing the Burden of Dengue during the COVID-19 Pandemic in Mexico
Source: MDPI journal article supplement (doi:10.3390/tropicalmed8040232), 2023-04-19
Supplement: s1 [file s1]

# Burden of dengue in Mexico during the COVID-19 pandemic

Supplementary data

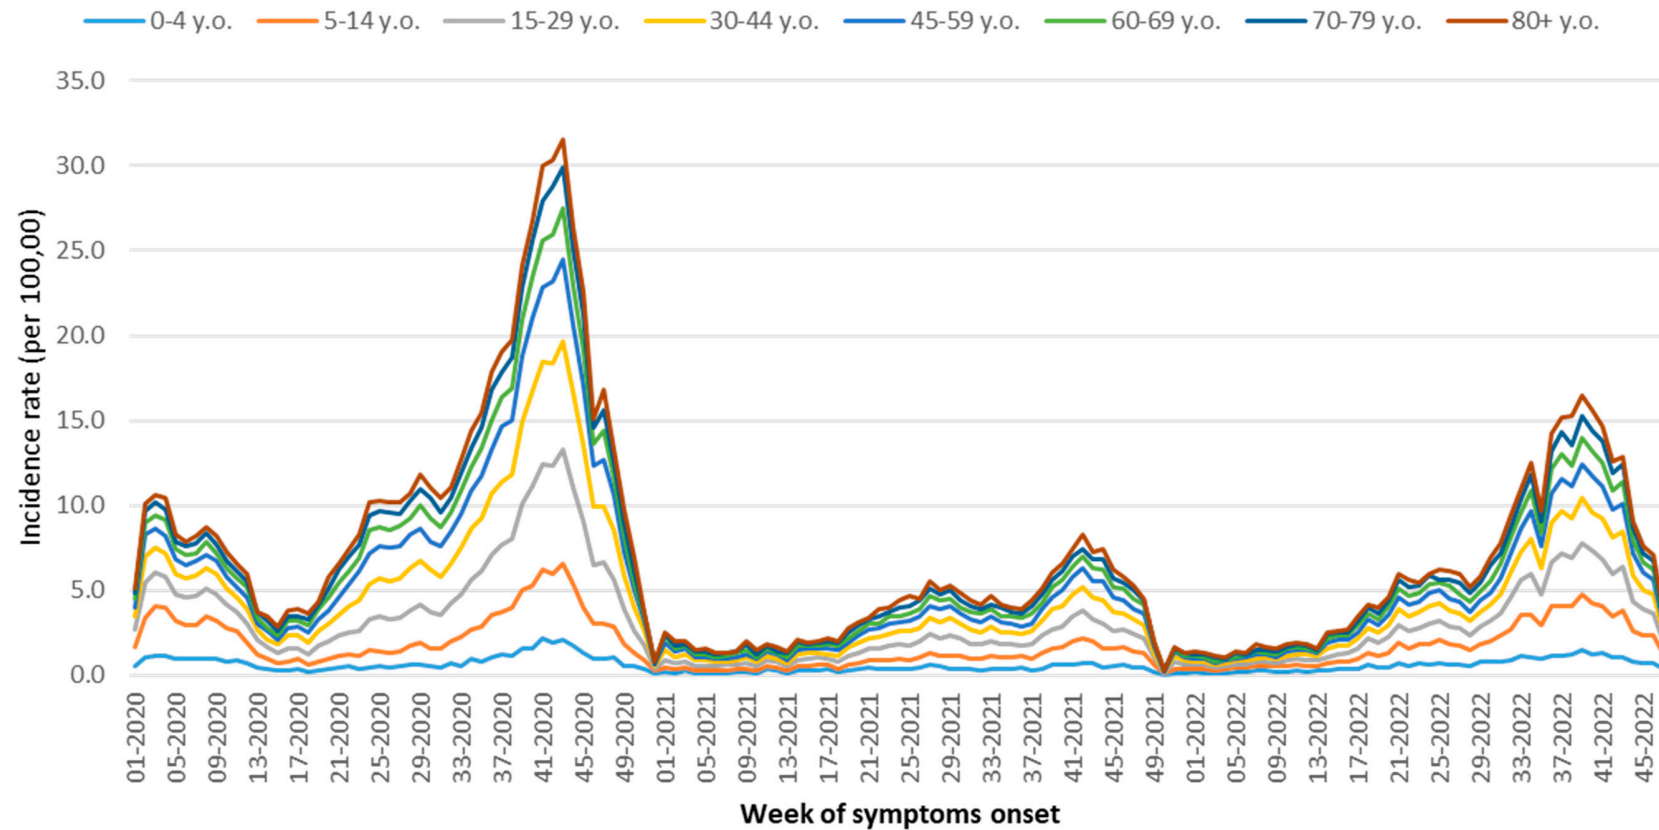

Supplementary Figure S1. Incidence rates (per 100,000) of dengue fever per age group, Mexico 2020–2022
